# Supplementary material
Source: Research Square preprint supplement (doi:10.21203/rs.3.rs-10094800/v1)
Supplement: Supplementary file 1 [file 4ae868d90bc2df75bc6ff293.docx]

**Supplementary Material**

From Biomarker Evidence to Treatment Delivery in Gastro-oesophageal Junction Adenocarcinoma: A Structured Review of the Test-to-Treat Gap

**Contents**

**Supplementary Appendix 1.** Full Search Strategy

**Supplementary Appendix 2.** Evidence Hierarchy Table

Supplementary Appendix 1: Full Search Strategy

**Manuscript title:** From Biomarker Evidence to Treatment Delivery in Gastro-oesophageal Junction Adenocarcinoma: A Structured Review of the Test-to-Treat Gap

**Review type:** Structured narrative review (SANRA framework)

**Search dates:** 1 January 2000 to 31 December 2025

**1. Databases Searched**

- PubMed/MEDLINE
- Embase (via Ovid)
- Cochrane Central Register of Controlled Trials (CENTRAL)

**2. Supplementary Sources**

**Guideline repositories:** ESMO (www.esmo.org), NCCN (www.nccn.org), JGCA (www.jgca.jp), ASGE (www.asge.org), ESGE (www.esge.com), ACG (www.gi.org)

**Congress proceedings (2024–2025):** ASCO Annual Meeting; ASCO GI Cancers Symposium; ESMO Congress; ESMO GI Oncology Congress

**3. PubMed/MEDLINE Search Strategy**

**Database:** PubMed/MEDLINE

**Date range:** 1 January 2000 – 31 December 2025

**Language:** English, or English-language abstract available

("gastroesophageal junction"[MeSH Terms]

OR "gastroesophageal junction adenocarcinoma"[tiab]

OR "gastro-oesophageal junction"[tiab]

OR "gastro-oesophageal junction adenocarcinoma"[tiab]

OR "GEJ adenocarcinoma"[tiab] OR "GOJ adenocarcinoma"[tiab]

OR "cardia cancer"[tiab] OR "junctional cancer"[tiab]

OR "Siewert"[tiab] OR "Barrett adenocarcinoma"[tiab])

AND

("neoadjuvant chemoradiotherapy"[tiab] OR "perioperative chemotherapy"[tiab]

OR "FLOT"[tiab] OR "CROSS"[tiab] OR "ESOPEC"[tiab]

OR "MATTERHORN"[tiab] OR "KEYNOTE-585"[tiab] OR "CheckMate 577"[tiab]

OR "immune checkpoint inhibitor"[tiab] OR "trastuzumab"[MeSH Terms]

OR "trastuzumab deruxtecan"[tiab] OR "pembrolizumab"[tiab]

OR "nivolumab"[tiab] OR "durvalumab"[tiab]

OR "zolbetuximab"[tiab] OR "bemarituzumab"[tiab]

OR "endoscopic submucosal dissection"[tiab]

OR "endoscopic mucosal resection"[tiab]

OR "biomarker testing"[tiab] OR "biomarker-directed"[tiab])

OR

("HER2"[tiab] OR "ERBB2"[MeSH Terms]

OR "PD-L1"[tiab] OR "programmed death ligand 1"[MeSH Terms]

OR "microsatellite instability"[MeSH Terms] OR "MSI-H"[tiab]

OR "mismatch repair"[MeSH Terms] OR "dMMR"[tiab]

OR "CLDN18.2"[tiab] OR "claudin 18"[tiab]

OR "FGFR2b"[tiab] OR "fibroblast growth factor receptor"[tiab]

OR "circulating tumour DNA"[tiab] OR "ctDNA"[tiab]

OR "cell-free DNA"[tiab])

Filters: 2000/01/01–25/12/31; English language.

**4. Embase Search Strategy (via Ovid)**

**Database:** Embase 1974–2025 via Ovid SP

**Date range:** 1 January 2000 – 31 December 2025

1. (gastroesophageal junction adenocarcinoma OR gastro-oesophageal junction

adenocarcinoma OR GEJ adenocarcinoma OR GOJ adenocarcinoma

OR cardia cancer OR junctional cancer OR Siewert

OR Barrett adenocarcinoma).ti,ab,kw.

2. exp gastroesophageal junction tumor/ OR exp gastric cardia cancer/

3. 1 OR 2

4. (FLOT OR CROSS OR ESOPEC OR MATTERHORN OR KEYNOTE-585

OR CheckMate 577 OR neoadjuvant chemoradiotherapy

OR perioperative chemotherapy OR immune checkpoint inhibitor

OR trastuzumab OR trastuzumab deruxtecan OR pembrolizumab

OR nivolumab OR durvalumab OR zolbetuximab OR bemarituzumab

OR endoscopic submucosal dissection

OR biomarker testing).ti,ab,kw.

5. exp antineoplastic agent/ AND exp immunotherapy/

6. (HER2 OR ERBB2 OR PD-L1 OR programmed death ligand 1

OR microsatellite instability OR MSI-H OR mismatch repair

OR dMMR OR CLDN18.2 OR claudin 18 OR FGFR2b

OR circulating tumour DNA OR ctDNA OR cell-free DNA).ti,ab,kw.

7. 4 OR 5 OR 6

8. 3 AND 7

9. limit 8 to (english language AND yr=2000–2025)

**5. CENTRAL (Cochrane Library)**

**Date range:** 1 January 2000 – 31 December 2025

#1 MeSH descriptor: [Esophagogastric Junction] explode all trees

#2 (gastroesophageal junction OR gastro-oesophageal junction

OR GOJ OR cardia cancer OR junctional cancer OR Siewert):ti,ab,kw

#3 #1 OR #2

#4 (FLOT OR CROSS OR ESOPEC OR MATTERHORN OR trastuzumab

OR pembrolizumab OR nivolumab OR durvalumab OR zolbetuximab

OR checkpoint inhibitor

OR endoscopic submucosal dissection):ti,ab,kw

#5 (HER2 OR ERBB2 OR PD-L1 OR MSI-H OR dMMR

OR CLDN18.2 OR FGFR2b OR ctDNA

OR circulating tumour DNA):ti,ab,kw

#6 #4 OR #5

#7 #3 AND #6

#8 #7 with Publication Year from 2000 to 2025, in Trials

**6. Guideline and Congress Hand-Searches**

***6.1 Guideline repositories***

| **Organisation** | **Resource** | **URL** | **Accessed** |
| --- | --- | --- | --- |
| ESMO | Clinical Practice Guidelines (oesophageal and gastric cancer) | www.esmo.org/guidelines | December 2025 |
| NCCN | Clinical Practice Guidelines (gastric cancer; oesophagogastric junction cancers) | www.nccn.org | December 2025 |
| JGCA | Japanese Gastric Cancer Treatment Guidelines | www.jgca.jp | December 2025 |
| ASGE | Standards of Practice (endoscopic resection; Barrett’s oesophagus) | www.asge.org | December 2025 |
| ESGE | Clinical Guidelines (ESD; Barrett’s oesophagus; staging) | www.esge.com | December 2025 |
| ACG | Clinical Guidelines (Barrett’s oesophagus) | www.gi.org | December 2025 |

***6.2 Congress proceedings (2024–2025)***

| **Congress** | **Year** | **Format searched** |
| --- | --- | --- |
| ASCO Annual Meeting | 2024, 2025 | Abstract book; late-breaking sessions; J Clin Oncol supplement |
| ASCO GI Cancers Symposium | 2024, 2025 | Abstract book; oral and poster sessions |
| ESMO Congress | 2024, 2025 | Abstract book; presidential symposium; Ann Oncol supplement |
| ESMO GI Oncology Congress | 2024, 2025 | Abstract book; oral sessions |

*Specific late-breaking abstracts hand-searched by trial name: MATTERHORN (LBA81, ESMO 2025), KEYNOTE-811 final OS (1400O, ESMO 2024), KEYNOTE-585 final analysis, FORTITUDE-101 (LBA10, ESMO 2025), ESOPEC (N Engl J Med 2025, identified in database search and confirmed in congress proceedings).*

**7. Eligibility Criteria**

***Inclusion criteria***

| **Category** | **Eligibility** |
| --- | --- |
| Phase III RCTs | Reporting OS, EFS, DFS, PFS, or pCR in resectable, locally advanced, or metastatic GOJAC, gastric, or oesophageal adenocarcinoma |
| Phase II studies | Where they underpinned regulatory approval or informed biomarker-directed practice (e.g. DESTINY-Gastric01, DESTINY-Gastric02, KEYNOTE-158 gastric cohort) |
| Systematic reviews and meta-analyses | Where relevant to biomarker testing, perioperative strategy, or endoscopic management |
| Prospective cohort studies | Informing biomarker testing completeness, surgical outcomes, or ctDNA prognostication |
| Prospective registry studies | Large multi-centre registries with biomarker testing or treatment-pattern data |
| Clinical practice guidelines | ESMO, NCCN, JGCA, ASGE, ESGE, ACG — current versions |
| Translational/biomarker studies | With direct therapeutic relevance (assay concordance, ctDNA prognostication) |
| Real-world evidence | Large database studies informing biomarker testing completeness or treatment patterns |

***Exclusion criteria***

| **Category** | **Reason for exclusion** |
| --- | --- |
| Case reports | Insufficient generalisability |
| Editorial commentaries without primary data | Not primary evidence |
| Preclinical studies without translational endpoints | Outside review scope |
| Phase I dose-finding studies | Not practice-relevant at present |
| Non-English language publications (without English abstract) | Inaccessible for synthesis |
| Conference posters without published abstract | Insufficient methodological detail |

**8. Selection Process**

Titles and abstracts were screened against the eligibility criteria by the authors. Full texts were retrieved for all potentially eligible publications. Where evidence derived from subgroup analyses within pooled gastro-oesophageal trials, findings are treated as supportive rather than definitive, and GOJAC-specific inferences are explicitly qualified as extrapolative. Congress abstracts are included where they represent the most current available data for pivotal trials and are clearly identified as congress-level evidence at each citation. Where multiple publications report different analyses from the same trial (e.g. KEYNOTE-811 interim and final analyses; MATTERHORN EFS and OS), each is cited separately with its evidential status labelled. Disagreements during selection were resolved by consensus discussion.

**9. Search Yield Summary**

| **Source** | **Records identified** | **Screened** | **Full texts reviewed** | **Included** |
| --- | --- | --- | --- | --- |
| PubMed/MEDLINE | ~2,840 | ~2,840 | ~310 | 50 |
| Embase | ~1,920 | ~1,920 | ~180 | (deduplicated) |
| CENTRAL | ~380 | ~380 | ~60 | (deduplicated) |
| Guideline hand-searches | 24 documents | 24 | 6 | 6 (refs 16–20) |
| Congress hand-searches 2024–2025 | ~95 abstracts | ~95 | ~18 | 5 (refs 25, 33, 45, and related) |
| Total (after deduplication) | ~4,100 | ~4,100 | ~430 | 50 |

*Records identified are approximate. Included citations correspond to references 1–50 in the manuscript. The narrative design means that inclusion represents the authors’ synthesis of the most evidentially relevant sources.*

Supplementary Appendix 2: Evidence Hierarchy Table

This table classifies all 50 references cited in the manuscript by evidence type. It enables readers to assess the evidentiary basis of each claim and identify which conclusions rest on peer-reviewed phase III data, congress-level data, observational evidence, or regulatory documents.

**Evidence Type Definitions**

| **Code** | **Evidence type** | **Definition** |
| --- | --- | --- |
| Ph3-RCT | Peer-reviewed phase III RCT | Full publication of a phase III RCT in a peer-reviewed journal reporting a prespecified primary endpoint |
| Ph2-RCT | Peer-reviewed phase II RCT | Full publication of a phase II RCT underpinning regulatory approval or guideline-level practice |
| Ph2-SA | Peer-reviewed phase II single-arm | Single-arm study published in full, included because it underpinned regulatory approval |
| Congress-JS | Congress abstract, journal supplement | Abstract in a peer-reviewed journal supplement; not a full peer-reviewed primary publication |
| Congress-P | Congress presentation, abstract only | Data presented at congress with abstract; no peer-reviewed journal supplement at time of citation |
| Reg-Doc | Regulatory document | Official regulatory agency approval notice or press release |
| Protocol | Trial protocol | Published trial protocol; primary results not yet available |
| Obs-Reg | Prospective observational registry | Prospective multi-centre registry study reporting real-world data |
| Obs-DB | Retrospective database study | Retrospective analysis of administrative or electronic health record database |
| Obs-Cohort | Prospective cohort study | Prospective cohort without randomisation |
| SR/MA | Systematic review or meta-analysis | Formal systematic review with or without meta-analysis |
| Guideline | Clinical practice guideline | Society or national clinical practice guideline |
| SANRA | Methodological framework | Quality assessment framework for narrative review design |
| Genomics | Genomic / translational study | Comprehensive molecular profiling study |
| Epidemiology | Epidemiological study | Population-level cancer incidence or burden analysis |
| Correspondence | Journal correspondence | Letter to journal editor; not a primary trial publication |

**Reference Classification Table**

*References are numbered as in the revised manuscript. “Peer-reviewed?”: Yes = full peer-reviewed journal article; No = congress abstract, regulatory document, protocol, or correspondence only.*

| **Ref** | **First author (year)** | **Trial / study** | **Evidence type** | **Peer-reviewed?** | **Key note** |
| --- | --- | --- | --- | --- | --- |
| 1 | Siewert (1998) | Siewert classification | Guideline/Classification | Yes | Foundational classification schema |
| 2 | Sung (2021) | GLOBOCAN 2020 | Epidemiology | Yes | — |
| 3 | Arnold (2020) | — | Epidemiology | Yes | — |
| 4 | Coleman (2018) | — | Epidemiology | Yes | Review article |
| 5 | Smyth (2020) | — | Epidemiology | Yes | Seminar article |
| 6 | Ajani (2017) | — | Epidemiology | Yes | Primer article |
| 7 | TCGA (2014) | TCGA Gastric | Genomics | Yes | Comprehensive molecular profiling |
| 8 | Nakauchi (2025) | — | Genomics | Yes | Translational study |
| 9 | Hess (2022) | Flatiron database | Obs-DB | Yes | US community oncology database; 2017–2020. Note: ref 9 in revised manuscript (was ref 44 in prior version) |
| 10 | Lordick (2025) | SAPHIR registry | Obs-Reg | Yes | Prospective registry, Germany 2019–2022. Note: ref 10 in revised manuscript (was ref 45 in prior version) |
| 11 | Baethge (2019) | SANRA | SANRA | Yes | Methodological framework |
| 12 | Findlay (2015) | — | SR/MA | Yes | Systematic review of FDG-PET in staging |
| 13 | Pech (2010) | — | Obs-Cohort | Yes | Single-centre prospective EUS cohort |
| 14 | Leake (2012) | — | SR/MA | Yes | Systematic review of peritoneal cytology |
| 15 | Nath (2008) | — | Obs-Cohort | Yes | Prospective peritoneal lavage cohort |
| 16 | Obermannová (2022) | ESMO CPG Oesophageal | Guideline | Yes | Current ESMO oesophageal cancer guideline |
| 17 | Lordick (2022) | ESMO CPG Gastric | Guideline | Yes | Current ESMO gastric cancer guideline |
| 18 | Ajani (2022) | NCCN v2.2022 | Guideline | Yes | Current NCCN gastric cancer guideline |
| 19 | Shaheen (2022) | ACG Barrett’s guideline | Guideline | Yes | Current ACG Barrett’s oesophagus guideline |
| 20 | Pimentel-Nunes (2022) | ESGE ESD guideline | Guideline | Yes | Current ESGE ESD guideline update |
| 21 | Ishihara (2020) | JGES ESD/EMR guideline | Guideline | Yes | Current JGES endoscopic guideline |
| 22 | Hoeppner (2025) | ESOPEC | Ph3-RCT | Yes | Published January 2025, NEJM; Siewert I/II; FLOT vs CROSS |
| 23 | Al-Batran (2019) | FLOT4 | Ph3-RCT | Yes | Published April 2019, Lancet |
| 24 | Janjigian (2025) | MATTERHORN (EFS) | Ph3-RCT | Yes | Published July 2025, NEJM; primary EFS endpoint only |
| 25 | Tabernero (2025) | MATTERHORN (OS) | Congress-JS | No | ESMO 2025, Abstract LBA81; OS is prespecified secondary endpoint; peer-reviewed publication pending |
| 26 | US FDA (2025) | Durvalumab approval | Reg-Doc | N/A | FDA news release, 25 November 2025 |
| 27 | Shitara (2025) | KEYNOTE-585 (final) | Ph3-RCT | Yes | J Clin Oncol 2025 |
| 28 | Kelly (2021) | CheckMate 577 | Ph3-RCT | Yes | NEJM 2021 |
| 29 | van Hagen (2012) | CROSS (primary) | Ph3-RCT | Yes | NEJM 2012. Note: also cited as ref 29 in HER2 prevalence context (Van Cutsem 2015 is ref 31 in prior version; this slot in revised ms is CROSS) |
| 30 | Shapiro (2015) | CROSS (long-term) | Ph3-RCT | Yes | Lancet Oncol 2015 |
| 31 | Van Cutsem (2015) | ToGA HER2 screening | Obs-Cohort | Yes | HER2 prevalence; translational substudy |
| 32 | Janjigian (2023) | KEYNOTE-811 (interim) | Ph3-RCT | Yes | Lancet 2023; interim analysis |
| 33 | Janjigian (2024) | KEYNOTE-811 (final OS) | Congress-JS | No | Ann Oncol 2024, Abstract 1400O; full peer-reviewed primary OS publication not yet available |
| 34 | Janjigian (2024) | KEYNOTE-811 (NEJM correspondence) | Correspondence | N/A | Not a primary trial publication; cited for regulatory context only |
| 35 | Bang (2010) | ToGA | Ph3-RCT | Yes | Lancet 2010 |
| 36 | Shitara (2020) | DESTINY-Gastric01 | Ph2-RCT | Yes | NEJM 2020; regulatory approval basis |
| 37 | Van Cutsem (2023) | DESTINY-Gastric02 | Ph2-SA | Yes | Lancet Oncol 2023; single-arm |
| 38 | Janjigian (2021) | CheckMate 649 | Ph3-RCT | Yes | Lancet 2021 |
| 39 | Rha (2023) | KEYNOTE-859 | Ph3-RCT | Yes | Lancet Oncol 2023 |
| 40 | Le DT (2017) | — | Obs-Cohort | Yes | Translational; pan-tumour dMMR evidence |
| 41 | Shitara (2020) | KEYNOTE-062 | Ph3-RCT | Yes | JAMA Oncol 2020; MSI-H/dMMR subgroup (N=50) cited |
| 42 | Marabelle (2020) | KEYNOTE-158 | Ph2-SA | Yes | J Clin Oncol 2020; pan-tumour; gastric cohort N=24 |
| 43 | Shitara (2023) | SPOTLIGHT | Ph3-RCT | Yes | Lancet 2023 |
| 44 | Shah (2023) | GLOW | Ph3-RCT | Yes | Nat Med 2023 |
| 45 | Rha (2025) | FORTITUDE-101 (longer follow-up) | Congress-P | No | ESMO 2025, Abstract LBA10; congress presentation; peer-reviewed publication pending |
| 46 | Azad (2020) | — | Obs-Cohort | Yes | Gastroenterology 2020; prospective ctDNA cohort; N=145 |
| 47 | Jensen (2024) | — | Obs-Cohort | Yes | Gastric Cancer 2024; prospective cohort; N=86 |
| 48 | Bettoni (2025) | PLAGAST | Obs-Cohort | Yes | Nat Commun 2025; prospective cohort; N=122 |
| 49 | Tie (2024) | DYNAMIC (protocol) | Protocol | Yes (protocol only) | BMJ Open 2024; trial protocol; primary results not yet published |
| 50 | Maron (2019) | — | Obs-Cohort | Yes | Clin Cancer Res 2019; translational/observational |

**Summary by Evidence Type**

| **Evidence type** | **Count** | **References** |
| --- | --- | --- |
| Peer-reviewed phase III RCT (Ph3-RCT) | 14 | 22, 23, 24, 27, 28, 29, 30, 32, 35, 38, 39, 41, 43, 44 |
| Peer-reviewed phase II RCT / single-arm (Ph2) | 3 | 36, 37, 42 |
| Congress abstract, journal supplement | 2 | 25, 33 |
| Congress presentation, abstract only | 1 | 45 |
| Regulatory document | 1 | 26 |
| Trial protocol | 1 | 49 |
| Prospective observational registry | 1 | 10 |
| Retrospective database study | 1 | 9 |
| Prospective cohort study | 6 | 13, 15, 31, 46, 47, 48, 50 |
| Systematic review / meta-analysis | 2 | 12, 14 |
| Clinical practice guideline | 7 | 16, 17, 18, 19, 20, 21 (and ref 1) |
| Genomic / translational study | 2 | 7, 8 |
| Epidemiological / incidence study | 5 | 2, 3, 4, 5, 6 |
| Journal correspondence | 1 | 34 |
| SANRA methodological framework | 1 | 11 |
| Guideline/Classification (Siewert schema) | 1 | 1 |

**Congress-Level Evidence: Status at Time of Submission**

| **Ref** | **Trial** | **Congress** | **Abstract** | **Status at submission** |
| --- | --- | --- | --- | --- |
| 25 | MATTERHORN (OS analysis) | ESMO 2025 | LBA81 | Congress abstract; Ann Oncol supplement; full peer-reviewed OS primary publication pending. Note: EFS data are peer-reviewed (ref 24, NEJM 2025). |
| 33 | KEYNOTE-811 (final OS) | ESMO 2024 | 1400O | Congress abstract; Ann Oncol supplement; full peer-reviewed primary OS publication not yet available. Interim data peer-reviewed (ref 32, Lancet 2023). |
| 45 | FORTITUDE-101 (longer follow-up) | ESMO 2025 | LBA10 | Congress presentation only; no journal supplement publication confirmed at time of submission; full peer-reviewed publication pending. |
